# Supplementary material for: Ceria–tungsten–tin oxide catalysts with superior regeneration capacity after sulfur poisoning for NH3-SCR process
Source: Royal Society of Chemistry journal article supplement (doi:10.1039/d2cy00036a), 2022-01-01
Supplement: d2cy00036a1.pdf [file d2cy00036a1.pdf]

## **Ceria-tungsten-tin oxide catalysts with superior regeneration capacity after sulfur poisoning for NH<sub>3</sub>-SCR process**

Jingjing Liu<sup>a</sup>, Xiaoyan Shi<sup>a, c</sup>, Zhihui Lv<sup>a</sup>, Yunbo Yu<sup>a, b, c</sup>, Hong He<sup>a, b, c\*</sup>

<sup>a</sup> State Key Joint Laboratory of Environment Simulation and Pollution Control, Research Center for Eco-Environmental Sciences, Chinese Academy of Sciences, Beijing 100085, China

<sup>b</sup> Center for Excellence in Regional Atmospheric Environment, Institute of Urban Environment, Chinese Academy of Sciences, Xiamen 361021, China

<sup>c</sup> University of Chinese Academy of Sciences, Beijing 100049, China

\*Hong He: [honghe@rcees.ac.cn](mailto:honghe@rcees.ac.cn)

Includes 7 pages, 2 figures, 2 tables.

## Catalytic activity tests and kinetic studies

NH<sub>3</sub>-SCR activity tests of catalysts at steady-state were conducted in a quartz tube plug flow reactor. The feed gas consisted of 500 ppm NO, 530 ppm NH<sub>3</sub>, 5 vol. % O<sub>2</sub>, 5 vol. % H<sub>2</sub>O and balance N<sub>2</sub>. The gas flow rate was kept at 500 mL/min, which corresponded to a gas hourly space velocity (GHSV) of 120, 000 h<sup>-1</sup>. The concentrations of NO, NH<sub>3</sub>, NO<sub>2</sub>, SO<sub>2</sub> and N<sub>2</sub>O were continually monitored by an FTIR spectrometer (G470 Nicolet), which was equipped with a multiple path gas cell (2 m). The steady-state tests of NO/NH<sub>3</sub> oxidation activity were carried out on the same device as the NH<sub>3</sub>-SCR activity test. The gas mixture used was comprised of 500 ppm NO<sub>x</sub>/NH<sub>3</sub>, 5 vol.% O<sub>2</sub> and N<sub>2</sub> balance with a flow rate of 500 mL/min.

The kinetic experiments for standard SCR were also performed in the same fixed-bed reactor as the activity test. The NO<sub>x</sub> conversion was kept at less than 20% in the temperature range of 175-225 °C. The reaction rates of NO<sub>x</sub> conversion normalized by the specific area were determined as follows:

$$-R_{\text{NO}_x} = (F_{\text{NO}_x} \times x) / (W \times S) \quad (S1) \quad \text{where } F_{\text{NO}_x} \text{ is the}$$

molar flow rate of NO (in mol s<sup>-1</sup>),  $x$  is the conversion percentage of NO,  $W$  is the weight of catalyst (in g), and  $S$  is the specific surface area of catalyst (in m<sup>2</sup> g<sup>-1</sup>). The apparent activation energies ( $E_a$ , in kJ mol<sup>-1</sup>) were calculated from Arrhenius plots of the reaction rates.

## Catalyst characterization

N<sub>2</sub> adsorption-desorption isotherms were measured at -196 °C on a Micromeritics TriStar II 3020 analyzer to investigate the specific surface area and pore structure of catalysts. The catalysts were outgassed at 150 °C for 8 h before being analyzed.

A Bruker D8 Advance diffractometer equipped with a Cu K<sub>α</sub> X-ray tube was used for the collection of X-ray diffraction (XRD) patterns at 40 kV and 40 mA with a step size of 0.02° and a time per step of 0.2 s.

H<sub>2</sub> temperature programmed reduction (H<sub>2</sub>-TPR) experiments were carried out on a Micromeritics AutoChem 2920 chemisorption analyzer. In a typical measurement, 120 mg of catalyst was firstly preprocessed at 400 °C for 0.5 h in Ar with a total flow rate of 50

mL/min, and then the temperature was decreased to 50 °C and held for another 0.5 h under the 10 vol. % H<sub>2</sub>/Ar (50 mL/min) atmosphere. After that, the temperature was linearly increased from 50 to 1000 °C at a heating rate of 10 °C/min under the same atmosphere, and the H<sub>2</sub> consumption amount was detected by a thermal conductivity detector (TCD).

X-ray photoelectron spectroscopy (XPS) measurements were carried out on an X-ray photoelectron spectrometer (AXIS Supra/Ultra) with Al K $\alpha$  radiation (1486.7 eV). The binding energies were referenced to the C 1s line at 284.8 eV. Quantification of the Ce, W, Sn, S, N and O atomic fractions on the surface was obtained from the integration of Ce 3d, W 4f, Sn 3d, S 2p, N 1s and O 1s core level spectra with appropriate corrections for sensitivity factors.

The *in situ* DRIFTS experiments were performed using an FTIR spectrometer (Nicolet IS 50) equipped with an MCT/A detector. An Omega Programmable Temperature Controller was used to regulate the temperature for different experiments. Prior to each experiment, the catalyst was pretreated at 500 °C for 30 min in an air flow and then cooled down to 200 °C while purging with N<sub>2</sub>. For the NH<sub>3</sub> adsorption experiments, the background spectrum was collected in flowing N<sub>2</sub>, and then 500 ppm NH<sub>3</sub> was introduced to the catalyst surface. All spectra were recorded by accumulating 100 scans with a resolution of 4 cm<sup>-1</sup>, and the background spectra were automatically subtracted from the sample spectra.

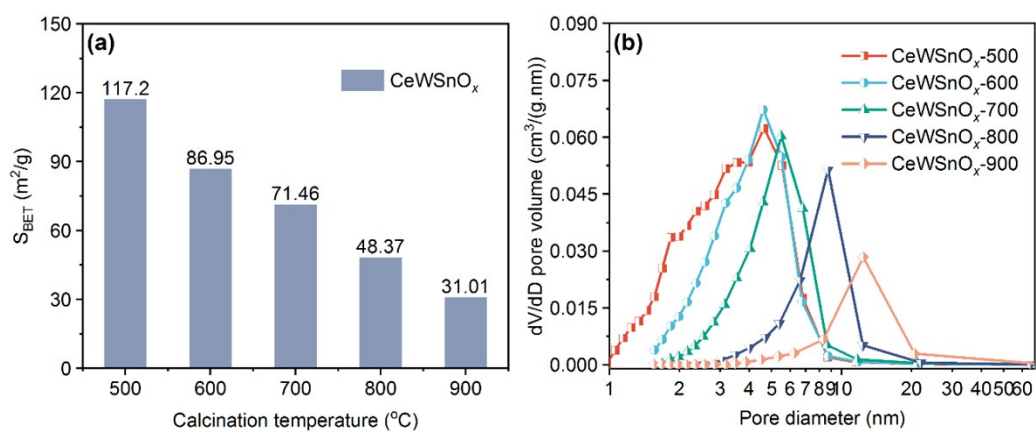

**Figure S1.** Effects of calcination temperature on the specific surface area (a) and BJH pore size distribution curves (b) of the CeWSnO<sub>x</sub> catalysts.

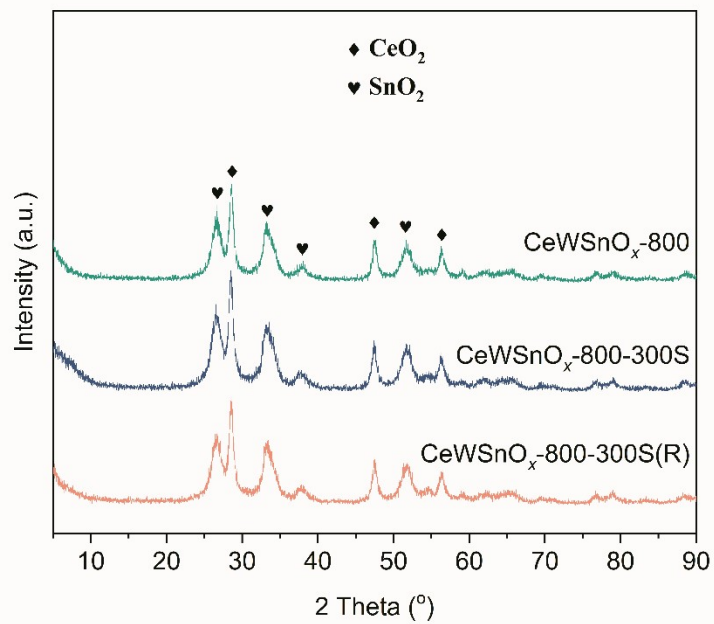

**Figure S2.** XRD patterns of CeWSnO<sub>x</sub>-800, CeWSnO<sub>x</sub>-800-300S and CeWSnO<sub>x</sub>-800-300S(R) catalysts.

**Table S1.** The textural parameters of catalysts calculated from the N<sub>2</sub> adsorption-desorption results.

| Catalysts                        | S <sub>BET</sub> | D <sub>average</sub> | V <sub>total</sub> |
|----------------------------------|------------------|----------------------|--------------------|
| CeWSnO <sub>x</sub> -800         | 49.77            | 7.39                 | 0.18               |
| CeWSnO <sub>x</sub> -800-300S    | 47.07            | 7.56                 | 0.18               |
| CeWSnO <sub>x</sub> -800-300S(R) | 51.78            | 7.18                 | 0.19               |

**Table S2.** Surface chemical compositions of catalysts according to the XPS results.

| Catalysts                            | Ce   | O     | Sn    | W    | N    | S    | S/N  |
|--------------------------------------|------|-------|-------|------|------|------|------|
| CeWSnO <sub>x</sub> -800             | 7.64 | 64.81 | 24.14 | 3.41 | 0.00 | 0.00 | 0.00 |
| CeWSnO <sub>x</sub> -800-<br>300S    | 6.96 | 66.46 | 21.86 | 3.17 | 0.05 | 1.50 | 3.00 |
| CeWSnO <sub>x</sub> -800-<br>300S(R) | 7.23 | 65.30 | 24.01 | 3.46 | 0.00 | 0.00 | 0.00 |
